# Supplementary material for: Expression of Iron Metabolism Proteins in Patients with Chronic Heart Failure
Source: MDPI journal article supplement (doi:10.3390/jcm11030837), 2022-02-05
Supplement: s1 [file s1]

**Table S1.** ELISA kits from ELK Biotechnology Co., Ltd Wuhan, Chine used in the study.

| Detected Protein                     | Catalog Number | Tested Range    |
|--------------------------------------|----------------|-----------------|
| divalent metal transporter - (DMT-1) | ELK4762        | 0.16–10 ng/ml   |
| L-type calcium channel Subunit       | ELK3707        | 0.32–20 ng/ml   |
| CACNa1D (L-CH)                       | ELK2912        | 0.125–8 ng/ml   |
| transferrin receptor -1(TfR)         | ELK2343        | 0.63–40 ng/ml   |
| transferrin receptor -2 (TfR-2)      | ELK3136        | 0.031–2 ng/ml   |
| ferritin heavy (FT-H),               | ELK3120        | 0.32–20 ng/ml   |
| ferritin—light (FT-L),               | ELK4761        | 0.32–20 ng/ml   |
| ferritin- mitochondrial (FT-MT)      | ELK3773        | 0.32–20 ng/ml   |
| ferroportin (FPN)                    | ELK5123        | 0.625–40 ng/ml  |
| hepcidin (Hepc)                      | ELK3265        | 0.63–40 ng/ml   |
| aconitase- 1 (ACO-1)                 | ELK4764        | 0.16–10 ng/ml   |
| iron response protein-2 (IREB-2)     | ELK1603        | 0.16–10 ng/ml   |
| hypoxia-induced factor (HIF-1)       | ELK5431        | 0.031–20 ng/ml  |
| hemojuvelin (HJV)                    | ELK8372        | 0.039–2.5 ng/ml |
| 4-hydroxynonenal (4-HNE)             |                |                 |

**Table S2. A-B.** Comprehensive clinical characteristics of the study group. A—demographic information, laboratory tests, echocardiography parameters, hemodynamic parameters, levels of iron-metabolism markers. B- concomitant treatment, electrotherapy, other data. Me—median. Q—quartile; N—number of patients, p—level of significance; **bold**—significant differences.

| A                          |               |               |          |       |         |       |          |               |
|----------------------------|---------------|---------------|----------|-------|---------|-------|----------|---------------|
|                            | unit          | Heart Failure |          | Women |         | Men   |          | p-Value       |
|                            |               | Me            | Q        | Me    | Q       | Me    | Q        |               |
| Demographic information    |               |               |          |       |         |       |          |               |
| Age                        | Yrs           | 53.5          | 10.5     | 58.0  | 10.0    | 53.0  | 10.5     | 0.4728        |
| Height                     | Cm            | 175.5         | 6.75     | 164   | 3.5     | 178   | 5        | <b>0.0001</b> |
| Body weight                | Kg            | 80.0          | 10.5     | 61    | 11.5    | 82.5  | 9.5      | <b>0.0005</b> |
| BSA- Body Surface Area     | m2            | 2.0           | 0.2      | 1.7   | 0.2     | 2.0   | 0.1      | <b>0.0001</b> |
| BMI- Body-mass index       | kg/m2         | 25.6          | 3.3      | 22.8  | 4.1     | 25.9  | 2.6      | 0.1453        |
| Laboratory tests           |               |               |          |       |         |       |          |               |
| NTproBNP                   | pg/ml         | 3955.5        | 2250.5   | 4436  | 1291.5  | 3833  | 2665     | 0.4014        |
| CRP                        | mg/dl         | 0.4           | 0.3      | 0.3   | 0.2     | 0.5   | 0.3      | 0.5100        |
| Na                         | mmol/l        | 138.0         | 3.0      | 139.0 | 3.0     | 138.0 | 3.0      | 0.1357        |
| K                          | mmol/l        | 4.3           | 0.3      | 4.3   | 0.3     | 4.3   | 0.3      | 0.5200        |
| Creatinine                 | mg/dl         | 1.2           | 0.2      | 1.0   | 0.1     | 1.2   | 0.1      | <b>0.0376</b> |
| Glomerular filtration rate | ml/min/1.73m2 | 60.0          | 4.5      | 60.0  | 5.0     | 60.0  | 4.3      | 0.5569        |
| Urea                       | mg/dl         | 47.0          | 9.9      | 45.6  | 9.6     | 47.0  | 10.0     | 0.8640        |
| AST                        | U/I           | 26.5          | 7.5      | 25.0  | 8.5     | 27    | 6.0      | 0.2184        |
| ALT                        | U/I           | 25.0          | 11.5     | 19.0  | 3.0     | 27.0  | 10.0     | <b>0.0218</b> |
| Bilirubin                  | mg/dl         | 0.7           | 0.4      | 1.0   | 0.2     | 0.6   | 0.3      | 0.3184        |
| Protein                    | g/dl          | 7.1           | 0.48     | 7.24  | 0.7     | 7.1   | 0.4      | 0.7231        |
| Glucose                    | mg/dl         | 93.78         | 9.9      | 98    | 11.93   | 91.9  | 8.82     | 0.2128        |
| Uric acid                  | mg/dl         | 7.3           | 1.269155 | 7.7   | 1.52162 | 7.3   | 1.235535 | 0.5237        |
| Total cholesterol          | mg/dl         | 145.8         | 26.5     | 148.8 | 10.5    | 144.6 | 33       | 0.5918        |
| LDL                        | mg/dl         | 94            | 22.5     | 105.4 | 25      | 89.1  | 23.7     | 0.2385        |
| HDL                        | mg/dl         | 34.61         | 8.62     | 34.23 | 7       | 35    | 8.62     | 0.9034        |
| TG                         | mg/dl         | 107           | 23.25    | 103   | 15      | 108   | 31.75    | 0.5802        |

|                                   | unit                | Heart Failure |       | Women |        | Men  |        | <i>p</i> -Value |
|-----------------------------------|---------------------|---------------|-------|-------|--------|------|--------|-----------------|
|                                   |                     | Me            | Q     | Me    | Q      | Me   | Q      |                 |
| Echocardiography parameters       |                     |               |       |       |        |      |        |                 |
| LVED                              | mm                  | 67            | 8     | 58.5  | 10.5   | 70   | 8.5    | <b>0.0069</b>   |
| LVSD                              | mm                  | 59            | 13    | 43    | 10.5   | 65   | 12     | <b>0.0033</b>   |
| LVEF                              | %                   | 20            | 7.5   | 20    | 10     | 20   | 5.5    | 0.1811          |
| PW                                | mm                  | 10            | 1.5   | 7.5   | 1.75   | 10   | 1.5    | <b>0.0099</b>   |
| IVS                               | mm                  | 9.15          | 2     | 9     | 1.9    | 9.3  | 2      | 0.2365          |
| PA                                | mm                  | 24            | 3.5   | 22.5  | 1.875  | 27   | 3      | <b>0.0310</b>   |
| RV                                | mm                  | 42            | 6.5   | 42    | 11     | 42   | 5.5    | 0.8857          |
| IM                                | + / + + + +         | 1.5           | 0.5   | 1.5   | 0.5    | 1.5  | 0.5    | 0.8520          |
| IT                                | + / + + + +         | 1.75          | 0.75  | 2.5   | 0.5    | 1.5  | 0.5    | <b>0.0184</b>   |
| PASP                              | mmHg                | 60            | 10    | 68.5  | 19     | 57.5 | 10     | 0.3490          |
| RVSP                              | mmHg                | 47            | 12.5  | 45    | 12.5   | 47   | 11     | 0.6869          |
| AccT                              | ms                  | 87.5          | 17    | 87    | 21.5   | 87.5 | 17     | 1               |
| VTI LVOT                          | cm                  | 10.4          | 4.1   | 12    | 0      | 9.7  | 5.8    | 1               |
| TAPSE                             | mm                  | 15            | 2     | 13    | 2      | 16   | 2      | <b>0.0133</b>   |
| Hemodynamic parameters            |                     |               |       |       |        |      |        |                 |
| RAP                               | mmHg                | 12            | 4.5   | 11.5  | 7.25   | 12   | 4.5    | 0.9026          |
| PAPs                              | mmHg                | 42            | 12.5  | 36    | 8.5    | 44   | 12     | 0.1052          |
| PAPd                              | mmHg                | 21            | 5     | 22.5  | 6.5    | 21   | 5      | 0.8147          |
| PAPm                              | mmHg                | 29            | 7.5   | 26.5  | 5.5    | 29   | 7      | 0.2711          |
| PWPM                              | mmHg                | 21            | 5.5   | 19.   | 19.5   | 21   | 7.5    | 0.2624          |
| TCG                               | mmHg                | 8.5           | 3     | 9     | 1.5    | 8    | 3      | 0.4742          |
| CO                                | l/min               | 3.45          | 0.775 | 2.56  | 0.3675 | 3.7  | 0.675  | 0.0058          |
| PVR                               | Wood Units          | 2.21          | 0.93  | 2.73  | 1.3575 | 2.21 | 0.73   | 0.2157          |
| SVR                               | Wood Units          | 13.3          | 2.795 | 22.38 | 10.85  | 12.6 | 2.2475 | 0.0969          |
| sBP                               | mmHg                | 104.5         | 13    | 111   | 14     | 104  | 13     | 1               |
| dBp                               | mmHg                | 65.5          | 5.5   | 65.5  | 7.5    | 65.5 | 5.5    | 0.9806          |
| mBP                               | mmHg                | 78            | 7.5   | 82    | 8      | 76   | 7      | 0.6020          |
| Levels of Iron-Metabolism Markers |                     |               |       |       |        |      |        |                 |
| RBC                               | 10 <sup>6</sup> /ul | 4.54          | 0.51  | 4.77  | 0.51   | 4.54 | 0.475  | 0.1950          |

|                         | unit                | Heart Failure |        | Women  |         | Men    |          | <i>p</i> -Value |
|-------------------------|---------------------|---------------|--------|--------|---------|--------|----------|-----------------|
|                         |                     | Me            | Q      | Me     | Q       | Me     | Q        |                 |
| HT                      | %                   | 42            | 4.3    | 43.4   | 5.3     | 42     | 4.5      | 0.2964          |
| Hb                      | g/dl                | 14.05         | 1.4    | 14.3   | 1.5     | 14     | 1.2      | 0.5261          |
| MCV                     | fl                  | 91            | 3.55   | 90     | 4.8     | 91     | 3.5      | 0.7371          |
| MCH                     | pg                  | 30.6          | 1.5    | 30.9   | 1.3     | 30.3   | 1.5      | 0.8012          |
| MCHC                    | pg                  | 32.9          | 1      | 32.65  | 0.67    | 33.5   | 0.95     | 0.1193          |
| RDW-SD                  | fl                  | 47.8          | 3.95   | 48.1   | 4.9     | 47.6   | 3.75     | 0.6845          |
| RDW-CV                  | %                   | 14.4          | 1.4    | 14.35  | 1.22    | 14.5   | 1.4      | 0.3431          |
| WBC                     | 10 <sup>3</sup> /ul | 7.6           | 1.25   | 6.6    | 1.05    | 7.7    | 1.2      | 0.0676          |
| PLT                     | 10 <sup>3</sup> /ul | 202           | 44     | 200    | 39.5    | 204    | 44       | 0.9925          |
| MPV                     | fl                  | 11            | 0.7    | 10.2   | 0.57    | 11.2   | 0.75     | 0.0709          |
| RET %                   | %                   | 1.635         | 0.495  | 1.69   | 0.235   | 1.58   | 0.53     | 0.7642          |
| RET                     | 10 <sup>6</sup> /ul | 0.067         | 0.0185 | 0.076  | 0.007   | 0.0655 | 0.019825 | 0.4549          |
| IRF                     | %                   | 15.45         | 5.65   | 16.9   | 7.9     | 14.7   | 5.55     | 0.2399          |
| LRF                     | %                   | 85.3          | 4.6    | 83.1   | 7.9     | 85.6   | 5.05     | 0.2088          |
| MFR                     | %                   | 11.4          | 2.4    | 14.4   | 1.55    | 11.3   | 3.25     | 0.2088          |
| HFR                     | %                   | 2.95          | 2.6    | 3      | 5.65    | 2.9    | 2.15     | 0.3937          |
| RET-Hb                  | pg                  | 32            | 2      | 26     | 3.1     | 32     | 1.575    | 0.0960          |
| Iron                    | ug/dl               | 77.55         | 27.15  | 79.1   | 25      | 76     | 29.7     | 0.5820          |
| Ferritin                | ng/ml               | 212.1         | 89.1   | 230    | 122.5   | 202.55 | 82.5     | 0.8663          |
| Transferrin             | mg/dl               | 242           | 51.5   | 70.785 | 130.675 | 246    | 43.5     | 0.0645          |
| TSAT                    | %                   | 21            | 8.55   | 18     | 7.1     | 24.2   | 7.5      | 0.1138          |
| sTfR                    | mg/l                | 3.185         | 1.14   | 3.26   | 1.565   | 3.185  | 1.21     | 0.4380          |
| sTfR1/logFR<br>ferritin | -                   | 0.61          | 0.27   | 0.63   | 0.36    | 0.61   | 0.21     | 0.2327          |
| Erythropoietin          | mIU/ml              | 18.3          | 11.35  | 28.55  | 16.125  | 16.1   | 10.11    | <b>0.0386</b>   |
| Folic acid              | ng/ml               | 7.45          | 2.0475 | 8.4    | 1.895   | 7.34   | 2.005    | 0.4040          |
| Vitamin B12             | pg/ml               | 395.3         | 137.15 | 386    | 80.1    | 396.5  | 148.05   | 0.61343         |

Aberrations: NTproBNP (N-terminal pro-brain natriuretic peptide), CRP (C-reactive protein), AST (aspartate aminotransferase), ALT (alanine aminotransferase), LDL (low-density lipoprotein), HDL (high-density lipoprotein), TG (triglycerides), LVED (left ventricle diameters diastolic), LVSD (left ventricle diameters systolic), LVEF(left ventricle ejection fraction), PW (posterior wall), IVS (intraventricular septal width), PA (pulmonary artery), RV (right ventricle diastolic size), IM (mitral insufficiency), IT(tricuspid insufficiency), PASP (pulmonary artery pressure systolic),, RVSP (right ventricular systolic pressure), AccT (acceleration time), VTI LVOT (Left ventricular outflow tract velocity time integral), TAPSE (tricuspid annular plane systolic excursion), RAP (right atrium pressure), PAPs (pulmonary artery pressure systolic), PAPm (pulmonary artery pressure mean), PWPm (pulmonary capillary wedge pressure mean), TCG (transpulmonary

pressure gradient), CO(cardiac output), PVR (pulmonary vascular resistance), SVR (systemic vascular resistance), sBP (systolic blood pressure), dBP ( diastolic blood pressure), mBP (mean blood pressure), RBC (red blood cells), HT (hematocrit), Hb (hemoglobin), MCV (mean corpuscular volume), MCH (mean corpuscular hemoglobin), MCHC (mean corpuscular hemoglobin concentration), RDW-SD ( red blood cell distribution width-standard deviation), RDW-CV (red blood cell distribution width- coefficient of variation), WBC (white blood cells), PLT (platelets), MPV (mean platelet volume), RET % ( reticulocyte %),RET (reticulocyte), IRF (immature reticulocyte fraction), LRF (low-fluorescence reticulocytes.), MFR( middle-fluorescence reticulocytes....), HFR (high-fluorescence reticulocytes), RET-Hb (reticulocyte hemoglobin), TSAT (transferrin saturation), sTfR (soluble transferrin receptor) sTfR1/logfR (soluble transferrin receptor/logarithm of ferritin).



|                                             | Heart Failure |      | Women |       | Men  |       | P-Value |
|---------------------------------------------|---------------|------|-------|-------|------|-------|---------|
|                                             | N             | %    | N     | %     | N    | %     |         |
| Implantable cardioverter-defibrillator- ICD | 10            | 17.2 | 4     | 30.76 | 6    | 13.33 |         |
| Cardiac resynchronization therapy- CRT-D    | 35            | 60.4 | 8     | 61.54 | 27   | 60    |         |
| Other data                                  |               |      |       |       |      |       |         |
| Ischemic                                    | 18.0          | 31.0 | 2.0   | 15.4  | 16.0 | 35.6  | 0.2008  |
| Cardiomyopathy                              | 36.0          | 62.1 | 9.0   | 69.2  | 27.0 | 60    |         |
| Other                                       | 4.0           | 6.9  | 2     | 15.4  | 2    | 44.4  |         |
| NYHA: 3                                     | 31            | 53.4 | 6     | 46.2  | 25   | 55.5  | 0.5494  |
| NYHA: 4                                     | 27            | 46.6 | 7     | 53.84 | 20   | 44.4  |         |
| Sinus rhythm                                | 40            | 69   | 7     | 53.84 | 33   | 73.3  | 0.1810  |
| No-Sinus rhythm                             | 18            | 31   | 6     | 46.2  | 12   | 26.7  |         |

**Table S3. Characteristics of the control group.** Me—median. Q—quartile.

| Demographic Information | Control group | n = 31 |
|-------------------------|---------------|--------|
|                         | Me            | Q      |
| Age                     | 36.0          | 10.0   |
| Women                   | n = 11        | 35.5%  |
| Men                     | n = 20        | 64.5%  |
| Height                  | 175.0         | 7.0    |
| Body weight             | 77.0          | 11.5   |
| BSA- Body Surface Area  | 1.9           | 0.2    |
| BMI- Body-mass index    | 24.8          | 2.6    |



**Table S4.** Expression of iron handling proteins, iron regulatory factors, and an oxidative stress marker in the non-failing compared to the failing human myocardium. P—level of significance; **bold**—significant differences.

| Parameter | Units | Non- Failing heart    | Failing Heart         | <i>p</i> -value | Failing Heart  |                | <i>p</i> -value |
|-----------|-------|-----------------------|-----------------------|-----------------|----------------|----------------|-----------------|
|           |       |                       |                       |                 | Women          | Men            |                 |
| DMT-1     | ng/ml | <b>5.8 +/- 1.1</b>    | <b>4.3 +/- 0.6</b>    | <b>0.0001</b>   | 4.3 +/- 0.7    | 4.3 +/- 0.6    | 0.067654        |
| L-CH      | ng/ml | <b>67.3 +/- 23.2</b>  | <b>47.3 +/- 8.5</b>   | <b>0.0019</b>   | 42.8 +/- 7.3   | 48.4 +/- 8.1   | 0.709208        |
| TfR-1     | ng/ml | <b>173.0 +/- 36.5</b> | <b>152.0 +/- 30.8</b> | <b>0.0038</b>   | 155.3 +/- 24.8 | 151.6 +/- 33.4 | 0.635486        |
| TfR-2     | ng/ml | 11.9 +/- 1.2          | 11.3 +/- 2.1          | 0.1541          | 12.4 +/- 1.5   | 11.1 +/- 2.0   | 0.68165         |
| FT-H      | ng/ml | <b>28.1 +/- 5.0</b>   | <b>23.5 +/- 3.8</b>   | <b>0.0189</b>   | 24.3 +/- 3.2   | 23.4 +/- 3.6   | 0.411974        |
| FT-L      | ng/ml | <b>22.1 +/- 7.4</b>   | <b>15.0 +/- 5.7</b>   | <b>0.0001</b>   | 17.1 +/- 4.6   | 14.3 +/- 5.3   | 0.723133        |
| FT-MT     | ng/ml | <b>55.9 +/- 12.4</b>  | <b>39.1 +/- 6.1</b>   | <b>0.0001</b>   | 37.7 +/- 5.2   | 40.1 +/- 6.1   | 0.17943         |
| FPN       | ng/ml | 75.4 +/- 14.6         | 80.5 +/- 28.0         | 0.3199          | 89.9 +/- 37.0  | 76.4 +/- 26.1  | 0.24766         |
| Hepc      | ng/ml | <b>23.8 +/- 7.2</b>   | <b>18.7 +/- 6.0</b>   | <b>0.0812</b>   | 24.9 +/- 9.1   | 17.9 +/- 4.6   | 0.082904        |
| ACO-1     | ng/ml | <b>58.1 +/- 8.6</b>   | <b>50.0 +/- 5.4</b>   | <b>0.0045</b>   | 54.7 +/- 3.9   | 49.7 +/- 6.0   | 0.444577        |
| IREB-2    | ng/ml | <b>1.0 +/- 0.3</b>    | <b>0.7 +/- 0.1</b>    | <b>0.0104</b>   | 0.7 +/- 0.1    | 0.7 +/- 0.1    | 0.542224        |
| HIF- 1    | ng/ml | <b>11.8 +/- 4.2</b>   | <b>7.9 +/- 2.2</b>    | <b>0.0007</b>   | 10.0 +/- 2.4   | 7.3 +/- 1.9    | 0.925721        |
| HJV       | ng/ml | 47.8 +/- 17.4         | 48.7 +/- 9.6          | 0.8262          | 46.5 +/- 9.5   | 49.2 +/- 9.6   | 0.68165         |
| 4-HNE     | pg/ml | <b>10.6 +/- 8.4</b>   | <b>55.7 +/- 33.7</b>  | <b>0.0001</b>   | 54.8 +/- 20.6  | 57.1 +/- 36.2  | 0.156455        |

Aberrations: DMT-1 (divalent metal transporter -1), L-CH (L-type calcium channel Subunit CACNa1D), TfR-1 or -2 (transferrin receptor -1 or -2), FT-H (ferritin heavy chain), FT-L (ferritin light chain), FT-MT (ferritin- mitochondrial), FPN (ferroportin), Hepc (hepcidin), ACO-1 (aconitase- 1), IREB-2 (iron response protein-2), HIF-1 (hypoxia-induced factor), HJV (hemojuvelin), 4-HNE (4-hydroxynonenal).

**Table S5.** Expression of iron handling proteins, iron regulatory factors, and an oxidative stress marker in the non-failing compared to the failing human myocardium with or without iron deficiency. <sup>a</sup>; <sup>b</sup>—levels of significance.

| Parameter | Units | Non- Failing Heart<br>n = 31 | Failing Heart<br>Non-Iron Deficient<br>n = 26 | Failing Heart<br>Iron Deficient<br>n = 32 |
|-----------|-------|------------------------------|-----------------------------------------------|-------------------------------------------|
| DMT-1     | ng/ml | 5.84 ± 1.07 a                | 4.18 ± 0.47 b                                 | 4.36 ± 0.56 b                             |
| L-CH      | ng/ml | 67.33 ± 23.19 a              | 43.08 ± 7.43 b                                | 54.03 ± 7.57 ab                           |
| TfR-1     | ng/ml | 173.02 ± 36.54 a             | 142.72 ± 32.17 b                              | 153.51 ± 31.22 ab                         |
| TfR-2     | ng/ml | 11.88 ± 1.24                 | 11.14 ± 1.21                                  | 11.28 ± 2.25                              |
| FT-H      | ng/ml | 28.07 ± 4.98                 | 24.03 ± 3.26                                  | 22.44 ± 5.47                              |
| FT-L      | ng/ml | 22.08 ± 7.41 a               | 17.03 ± 6.53 b                                | 12.24 ± 5.49 b                            |
| FT-MT     | ng/ml | 55.94 ± 12.43 a              | 34.77 ± 6.04 b                                | 44.05 ± 4.36 b                            |
| FPN       | ng/ml | 75.40 ± 14.58                | 69.80 ± 24.95                                 | 82.99 ± 27.27                             |

Aberrations: DMT-1 (divalent metal transporter -1), L-CH (L-type calcium channel Subunit CACNa1D), TfR-1 or -2 (transferrin receptor -1 or -2), FT-H (ferritin heavy chain), FT-L (ferritin light chain), FT-MT (ferritin- mitochondrial), FPN (ferroportin).

**Table S6.** Correlations between iron handling proteins, iron regulatory factors, and an oxidative stress marker in the non-failing human myocardium. X—not analyzed; \* - n = 31; ° - n = 26; p—level of significance; **bold**—significant differences.

|         | DMT-1*                  | L-CH°                   | TfR-1*                  | TfR-2*           | FT-H*                   | FT-L*                   | FT-MT*                  | FPN*                    | Hepc*                   | ACO-1*                  | IREB-2*                 | HIF- 1*                 | HJV*                    | 4-HNE°                  |
|---------|-------------------------|-------------------------|-------------------------|------------------|-------------------------|-------------------------|-------------------------|-------------------------|-------------------------|-------------------------|-------------------------|-------------------------|-------------------------|-------------------------|
| DMT-1*  | X                       | 0.3451                  | 0.1619                  | 0.0335           | 0.1290                  | 0.1435                  | <b>0.3936</b>           | 0.1820                  | 0.1202                  | 0.0855                  | 0.2264                  | -0.0680                 | -0.1741                 | -0.1057                 |
|         |                         | <i>p</i> = 0.084        | <i>p</i> = 0.384        | <i>p</i> = 0.858 | <i>p</i> = 0.489        | <i>p</i> = 0.441        | <i>p</i> = <b>0.028</b> | <i>p</i> = 0.327        | <i>p</i> = 0.519        | <i>p</i> = 0.647        | <i>p</i> = 0.221        | <i>p</i> = 0.716        | <i>p</i> = 0.349        | <i>p</i> = 0.607        |
| L-CH    | <i>p</i> = 0.084        | 0.3451                  | <b>0.5289</b>           | 0.3672           | 0.3441                  | <b>0.7371</b>           | <b>0.6245</b>           | <b>0.5302</b>           | 0.0442                  | 0.3753                  | <b>0.5198</b>           | 0.2674                  | <b>0.4088</b>           | -0.2757                 |
|         |                         | X                       | <i>p</i> = <b>0.005</b> | <i>p</i> = 0.065 | <i>p</i> = 0.085        | <i>p</i> = <b>0.000</b> | <i>p</i> = <b>0.001</b> | <i>p</i> = <b>0.005</b> | <i>p</i> = 0.830        | <i>p</i> = 0.059        | <i>p</i> = <b>0.007</b> | <i>p</i> = 0.187        | <i>p</i> = <b>0.038</b> | <i>p</i> = 0.173        |
| TfR-1*  | <i>p</i> = 0.384        | 0.1619                  | <b>0.5289</b>           | -0.0163          | <b>0.4022</b>           | -0.1671                 | 0.1129                  | <b>0.4634</b>           | -0.1610                 | <b>0.3809</b>           | <b>0.6008</b>           | -0.3222                 | 0.2939                  | <b>-0.4596</b>          |
|         |                         | <i>p</i> = 0.005        | X                       | <i>p</i> = 0.931 | <i>p</i> = <b>0.025</b> | <i>p</i> = 0.369        | <i>p</i> = 0.546        | <i>p</i> = <b>0.009</b> | <i>p</i> = 0.387        | <i>p</i> = <b>0.034</b> | <i>p</i> = <b>0.000</b> | <i>p</i> = 0.077        | <i>p</i> = 0.109        | <i>p</i> = <b>0.018</b> |
| TfR-2*  | <i>p</i> = 0.858        | 0.0335                  | 0.3672                  | -0.0163          |                         | 0.1431                  | 0.0026                  | -0.0645                 | 0.0761                  | 0.0163                  | 0.1845                  | -0.2211                 | 0.0727                  | 0.3406                  |
|         |                         | <i>p</i> = 0.065        | <i>p</i> = 0.320        | X                | <i>p</i> = 0.442        | <i>p</i> = 0.989        | <i>p</i> = 0.730        | <i>p</i> = 0.684        | <i>p</i> = 0.931        | <i>p</i> = 0.320        | <i>p</i> = 0.320        | <i>p</i> = 0.698        | <i>p</i> = 0.061        | <i>p</i> = 0.175        |
| FT-H*   | <i>p</i> = 0.489        | 0.1290                  | 0.3441                  | <b>0.4022</b>    | 0.1431                  |                         | 0.1111                  | 0.2337                  | <b>0.6595</b>           | <b>0.4007</b>           | <b>0.4951</b>           | <b>0.4660</b>           | -0.0774                 | 0.0802                  |
|         |                         | <i>p</i> = 0.085        | <i>p</i> = <b>0.025</b> | <i>p</i> = 0.442 | X                       | <i>p</i> = 0.552        | <i>p</i> = 0.206        | <i>p</i> = <b>0.000</b> | <i>p</i> = <b>0.025</b> | <i>p</i> = <b>0.005</b> | <i>p</i> = <b>0.008</b> | <i>p</i> = 0.679        | <i>p</i> = 0.668        | <i>p</i> = 0.110        |
| FT-L*   | <i>p</i> = 0.441        | 0.1435                  | <b>0.7371</b>           | -0.1671          | 0.0026                  | 0.1111                  |                         | <b>0.6626</b>           | 0.0283                  | 0.3427                  | 0.2516                  | 0.1147                  | 0.3326                  | 0.2321                  |
|         |                         | <i>p</i> = 0.000        | <i>p</i> = 0.369        | <i>p</i> = 0.989 | <i>p</i> = 0.552        | X                       | <i>p</i> = <b>0.000</b> | <i>p</i> = 0.880        | <i>p</i> = 0.059        | <i>p</i> = 0.172        | <i>p</i> = 0.539        | <i>p</i> = 0.067        | <i>p</i> = 0.209        | <i>p</i> = 0.299        |
| FT-MT*  | <i>p</i> = <b>0.028</b> | <b>0.3936</b>           | <b>0.6245</b>           | 0.1129           | -0.0645                 | 0.2337                  | <b>0.6626</b>           |                         | 0.2352                  | 0.3535                  | 0.1324                  | <b>0.4145</b>           | <b>0.3937</b>           | 0.0366                  |
|         |                         | <i>p</i> = <b>0.001</b> | <i>p</i> = 0.546        | <i>p</i> = 0.730 | <i>p</i> = 0.206        | <i>p</i> = <b>0.000</b> | X                       | <i>p</i> = 0.203        | <i>p</i> = 0.051        | <i>p</i> = 0.478        | <i>p</i> = <b>0.020</b> | <i>p</i> = <b>0.028</b> | <i>p</i> = 0.845        | <i>p</i> = <b>0.035</b> |
| FPN     | <i>p</i> = 0.327        | 0.1820                  | <b>0.5302</b>           | 0.4634           | 0.0761                  | <b>0.6595</b>           | 0.0283                  | 0.2352                  |                         | 0.1572                  | 0.2684                  | <b>0.6483</b>           | 0.0578                  | -0.1470                 |
|         |                         | <i>p</i> = <b>0.005</b> | <i>p</i> = 0.009        | <i>p</i> = 0.684 | <i>p</i> = <b>0.000</b> | <i>p</i> = 0.880        | <i>p</i> = 0.203        | X                       | <i>p</i> = 0.398        | <i>p</i> = 0.144        | <i>p</i> = <b>0.000</b> | <i>p</i> = 0.758        | <i>p</i> = 0.430        | <i>p</i> = <b>0.001</b> |
| Hepc*   | <i>p</i> = 0.519        | 0.1202                  | 0.0442                  | -0.1610          | 0.0163                  | <b>0.4007</b>           | 0.3427                  | 0.3535                  | 0.1572                  |                         | 0.2607                  | 0.2012                  | <b>0.4282</b>           | 0.0112                  |
|         |                         | <i>p</i> = 0.830        | <i>p</i> = 0.387        | <i>p</i> = 0.931 | <i>p</i> = <b>0.025</b> | <i>p</i> = 0.059        | <i>p</i> = 0.051        | <i>p</i> = 0.398        | X                       | <i>p</i> = 0.157        | <i>p</i> = 0.278        | <i>p</i> = <b>0.016</b> | <i>p</i> = 0.952        | <i>p</i> = 0.477        |
| ACO-1*  | <i>p</i> = 0.647        | 0.0855                  | 0.3753                  | <b>0.3809</b>    | 0.1845                  | <b>0.4951</b>           | 0.2516                  | 0.1324                  | 0.2684                  | 0.2607                  |                         | 0.3242                  | 0.0060                  | <b>0.4390</b>           |
|         |                         | <i>p</i> = 0.059        | <i>p</i> = <b>0.034</b> | <i>p</i> = 0.320 | <i>p</i> = <b>0.005</b> | <i>p</i> = 0.172        | <i>p</i> = 0.478        | <i>p</i> = 0.144        | <i>p</i> = 0.157        | X                       | <i>p</i> = 0.075        | <i>p</i> = 0.974        | <i>p</i> = <b>0.013</b> | <i>p</i> = 0.415        |
| IREB-2* |                         | 0.2264                  | <b>0.5198</b>           | <b>0.6008</b>    | -0.2211                 | <b>0.4660</b>           | 0.1147                  | <b>0.4145</b>           | <b>0.6483</b>           | 0.2012                  | 0.3242                  | X                       | 0.0170                  | -0.1992                 |
|         |                         |                         |                         |                  |                         |                         |                         |                         |                         |                         |                         |                         |                         | <b>-0.5620</b>          |

|         | DMT-1*      | L-CH°         | TfR-1*         | TfR-2*      | FT-H*       | FT-L*       | FT-MT*         | FPN*           | Hepc*         | ACO-1*        | IREB-2*        | HIF- 1*     | HJV*        | 4-HNE°      |
|---------|-------------|---------------|----------------|-------------|-------------|-------------|----------------|----------------|---------------|---------------|----------------|-------------|-------------|-------------|
| HIF- 1* | $p = 0.221$ | $p = 0.007$   | $p = 0.000$    | $p = 0.232$ | $p = 0.008$ | $p = 0.539$ | $p = 0.020$    | $p = 0.000$    | $p = 0.278$   | $p = 0.075$   |                | $p = 0.928$ | $p = 0.283$ | $p = 0.003$ |
|         | -0.0680     | 0.2674        | -0.3222        | 0.0727      | -0.0774     | 0.3326      | <b>0.3937</b>  | 0.0578         | <b>0.4282</b> | 0.0060        | 0.0170         |             | -0.0397     | -0.1829     |
|         | $p = 0.716$ | $p = 0.187$   | $p = 0.077$    | $p = 0.698$ | $p = 0.679$ | $p = 0.067$ | $p = 0.028$    | $p = 0.758$    | $p = 0.016$   | $p = 0.974$   | $p = 0.928$    | X           | $p = 0.832$ | $p = 0.371$ |
|         | -0.1741     | <b>0.4088</b> | 0.2939         | 0.3406      | 0.0802      | 0.2321      | 0.0366         | -0.1470        | 0.0112        | <b>0.4390</b> | -0.1992        | -0.0397     |             | 0.2536      |
| HJV*    | $p = 0.349$ | $p = 0.038$   | $p = 0.109$    | $p = 0.061$ | $p = 0.668$ | $p = 0.209$ | $p = 0.845$    | $p = 0.430$    | $p = 0.952$   | $p = 0.013$   | $p = 0.283$    | $p = 0.832$ | X           | $p = 0.211$ |
|         | -0.1057     | -0.2757       | <b>-0.4596</b> | 0.2743      | -0.3205     | -0.2119     | <b>-0.4148</b> | <b>-0.5976</b> | -0.1459       | -0.1669       | <b>-0.5620</b> | -0.1829     | 0.2536      |             |
| 4-HNE°  | $p = 0.607$ | $p = 0.173$   | $p = 0.018$    | $p = 0.175$ | $p = 0.110$ | $p = 0.299$ | $p = 0.035$    | $p = 0.001$    | $p = 0.477$   | $p = 0.415$   | $p = 0.003$    | $p = 0.371$ | $p = 0.211$ | X           |

Aberrations: DMT-1 (divalent metal transporter -1), L-CH (L-type calcium channel Subunit CACNa1D), TfR-1 or -2 (transferrin receptor -1 or -2), FT-H (ferritin heavy chain), FT-L (ferritin light chain), FT-MT (ferritin- mitochondrial), FPN (ferroportin), Hepc (hepcidin), ACO-1 (aconitase- 1), IREB-2 (iron response protein-2), HIF-1 (hypoxia-induced factor), HJV (hemojuvelin), 4-HNE (4-hydroxynonenal).

**Table S7.** Correlations between iron handling proteins, iron regulatory factors, and an oxidative stress marker in the failing human myocardium. \* - n = 31; # - n = 58; p—level of significance; **bold**—significant differences.

|          | DMT-1     | L-CH*     | TfR-1 #   | TfR-2 #   | FT-H #    | FT-L #    | FT-MT #   | FPN #     | Hepc #    | ACO-1 #   | IREB-2 #  | HIF- 1 #  | HJV #     | 4-HNE*    |
|----------|-----------|-----------|-----------|-----------|-----------|-----------|-----------|-----------|-----------|-----------|-----------|-----------|-----------|-----------|
| DMT-1 #  | X         | 0.6545    | 0.4456    | 0.2167    | 0.2854    | 0.2842    | 0.3407    | 0.3426    | 0.0061    | 0.3624    | 0.4261    | 0.5123    | 0.3104    | -0.3773   |
|          |           | p = 0.000 | p = 0.000 | p = 0.102 | p = 0.030 | p = 0.031 | p = 0.009 | p = 0.008 | p = 0.964 | p = 0.005 | p = 0.001 | p = 0.000 | p = 0.018 | p = 0.036 |
| L-CH*    | 0.6545    | X         | 0.3954    | 0.1794    | 0.4309    | 0.4909    | -0.0017   | 0.5214    | -0.4626   | 0.3894    | 0.2949    | 0.5682    | 0.4971    | -0.5707   |
|          | p = 0.000 |           | p = 0.028 | p = 0.334 | p = 0.016 | p = 0.005 | p = 0.993 | p = 0.003 | p = 0.009 | p = 0.030 | p = 0.107 | p = 0.001 | p = 0.004 | p = 0.001 |
| TfR-1 #  | 0.4456    | 0.3954    | X         | -0.007    | 0.3627    | 0.1107    | 0.1986    | 0.3804    | -0.1849   | 0.2545    | 0.2644    | 0.13      | 0.5472    | -0.3112   |
|          | p = 0.000 | p = 0.028 |           | p = 0.958 | p = 0.005 | p = 0.408 | p = 0.135 | p = 0.003 | p = 0.165 | p = 0.054 | p = 0.045 | p = 0.331 | p = 0.000 | p = 0.088 |
| TfR-2 #  | 0.2167    | 0.1794    | -0.007    | X         | 0.0274    | 0.4116    | 0.2916    | 0.1147    | 0.0181    | 0.1673    | 0.1882    | 0.1199    | -0.1709   | 0.0532    |
|          | p = 0.102 | p = 0.334 | p = 0.958 |           | p = 0.838 | p = 0.001 | p = 0.026 | p = 0.391 | p = 0.893 | p = 0.209 | p = 0.157 | p = 0.370 | p = 0.200 | p = 0.776 |
| FT-H #   | 0.2854    | 0.4309    | 0.3627    | 0.0274    | X         | 0.5119    | 0.2335    | 0.0847    | -0.1326   | 0.2247    | 0.2815    | 0.2337    | 0.0633    | -0.379    |
|          | p = 0.030 | p = 0.016 | p = 0.005 | p = 0.838 |           | p = 0.000 | p = 0.078 | p = 0.527 | p = 0.321 | p = 0.090 | p = 0.032 | p = 0.077 | p = 0.637 | p = 0.036 |
| FT-L #   | 0.2842    | 0.4909    | 0.1107    | 0.4116    | 0.5119    | X         | 0.001     | 0.0442    | 0.0397    | -0.0219   | -0.145    | 0.2597    | 0.1399    | -0.2013   |
|          | p = 0.031 | p = 0.005 | p = 0.408 | p = 0.001 | p = 0.000 |           | p = 0.994 | p = 0.742 | p = 0.767 | p = 0.871 | p = 0.278 | p = 0.049 | p = 0.295 | p = 0.278 |
| FT-MT #  | 0.3407    | -0.0017   | 0.1986    | 0.2916    | 0.2335    | 0.001     | X         | 0.005     | -0.1229   | 0.3277    | 0.5455    | 0.3648    | -0.1648   | 0.2483    |
|          | p = 0.009 | p = 0.993 | p = 0.135 | p = 0.026 | p = 0.078 | p = 0.994 |           | p = 0.970 | p = 0.358 | p = 0.012 | p = 0.000 | p = 0.005 | p = 0.216 | p = 0.178 |
| FPN #    | 0.3426    | 0.5214    | 0.3804    | 0.1147    | 0.0847    | 0.0442    | 0.005     | X         | -0.2833   | 0.247     | 0.2062    | 0.2231    | 0.2034    | -0.4219   |
|          | p = 0.008 | p = 0.003 | p = 0.003 | p = 0.391 | p = 0.527 | p = 0.742 | p = 0.970 |           | p = 0.031 | p = 0.062 | p = 0.120 | p = 0.092 | p = 0.126 | p = 0.018 |
| Hepc #   | 0.0061    | -0.4626   | -0.1849   | 0.0181    | -0.1326   | 0.0397    | -0.1229   | -0.2833   | X         | -0.2314   | -0.165    | 0.1756    | -0.0367   | -0.0907   |
|          | p = 0.964 | p = 0.009 | p = 0.165 | p = 0.893 | p = 0.321 | p = 0.767 | p = 0.358 | p = 0.031 |           | p = 0.081 | p = 0.216 | p = 0.187 | p = 0.785 | p = 0.628 |
| ACO-1 #  | 0.3624    | 0.3894    | 0.2545    | 0.1673    | 0.2247    | -0.0219   | 0.3277    | 0.247     | -0.2314   | X         | 0.5804    | 0.2639    | 0.0837    | -0.4478   |
|          | p = 0.005 | p = 0.030 | p = 0.054 | p = 0.209 | p = 0.090 | p = 0.871 | p = 0.012 | p = 0.062 | p = 0.081 |           | p = 0.000 | p = 0.045 | p = 0.532 | p = 0.012 |
| IREB-2 # | 0.4261    | 0.2949    | 0.2644    | 0.1882    | 0.2815    | -0.145    | 0.5455    | 0.2062    | -0.165    | 0.5804    | X         | 0.2266    | -0.1181   | -0.3355   |
|          | p = 0.001 | p = 0.107 | p = 0.045 | p = 0.157 | p = 0.032 | p = 0.278 | p = 0.000 | p = 0.120 | p = 0.216 | p = 0.000 |           | p = 0.087 | p = 0.377 | p = 0.065 |
| HIF- 1   | 0.5123    | 0.5682    | 0.13      | 0.1199    | 0.2337    | 0.2597    | 0.3648    | 0.2231    | 0.1756    | 0.2639    | 0.2266    | X         | 0.1402    | -0.3403   |
|          | p = 0.000 | p = 0.001 | p = 0.331 | p = 0.370 | p = 0.077 | p = 0.049 | p = 0.005 | p = 0.092 | p = 0.187 | p = 0.045 | p = 0.087 |           | p = 0.294 | p = 0.061 |
| HJV #    | 0.3104    | 0.4971    | 0.5472    | -0.1709   | 0.0633    | 0.1399    | -0.1648   | 0.2034    | -0.0367   | 0.0837    | -0.1181   | 0.1402    | X         | -0.2766   |
|          | p = 0.018 | p = 0.004 | p = 0.000 | p = 0.200 | p = 0.637 | p = 0.295 | p = 0.216 | p = 0.126 | p = 0.785 | p = 0.532 | p = 0.377 | p = 0.294 |           | p = 0.132 |
| 4-HNE*   | -0.3773   | -0.5707   | -0.3112   | 0.0532    | -0.379    | -0.2013   | 0.2483    | -0.4219   | -0.0907   | -0.4478   | -0.3355   | -0.3403   | -0.2766   | X         |
|          | p = 0.036 | p = 0.001 | p = 0.088 | p = 0.776 | p = 0.036 | p = 0.278 | p = 0.178 | p = 0.018 | p = 0.628 | p = 0.012 | p = 0.065 | p = 0.061 | p = 0.132 |           |

Aberrations: DMT-1 (divalent metal transporter -1), L-CH (L-type calcium channel Subunit CACNa1D), TfR-1 or -2 (transferrin receptor -1 or -2), FT-H (ferritin heavy chain), FT-L (ferritin light chain), FT-MT (ferritin- mitochondrial), FPN (ferroportin), Hepc (hepcidin), ACO-1 (aconitase- 1), IREB-2 (iron response protein-2), HIF-1 (hypoxia-induced factor), HJV (hemojuvelin), 4-HNE (4-hydroxynonenal).

**Table S8.** Correlations between iron-handling proteins in the failing human myocardium, iron serum markers and heart failure parameters.\* -

n = 31; - n = 58; p—level of significance; **bold**—significant differences.

|        | Hb                | Ferritin         | sTfR             | TSAT             | CRP              | LVEF             | TCG              | CO               | NT-proBNP        |
|--------|-------------------|------------------|------------------|------------------|------------------|------------------|------------------|------------------|------------------|
| DMT-1* | 0.1043            | 0.1269           | 0.2693           | 0.0620           | 0.1027           | 0.0440           | ,21130.          | 0.0392           | -0.1896          |
|        | <i>p</i> = 0.342  | <i>p</i> = 0.338 | <i>p</i> = 0.059 | <i>p</i> = 0.659 | <i>p</i> = 0.551 | <i>p</i> = 0.741 | <i>p</i> = 0.129 | <i>p</i> = 0.774 | <i>p</i> = 0.140 |
| L-CH   | -0.0788           | 0.1675           | 0.0708           | 0.2131           | 0.1324           | 0.0620           | 0.1318           | 0.2545           | 0.0538           |
|        | <i>p</i> = 0.0556 | <i>p</i> = 0.336 | <i>p</i> = 0.705 | <i>p</i> = 0.226 | <i>p</i> = 0.463 | <i>p</i> = 0.736 | <i>p</i> = 0.488 | <i>p</i> = 0.167 | <i>p</i> = 0.759 |
| TfR-1* | 0.0843            | 0.1670           | 0.2690           | -0.0217          | 0.1645           | 0.1216           | 0.2299           | <b>0.2646</b>    | -0.0115          |
|        | <i>p</i> = 0.443  | <i>p</i> = 0.206 | <i>p</i> = 0.059 | <i>p</i> = 0.878 | <i>p</i> = 0.338 | <i>p</i> = 0.359 | <i>p</i> = 0.222 | <b>p = 0.049</b> | <i>p</i> = 0.929 |
| TfR-2* | 0.1533            | 0.1443           | 0.2067           | -0.0563          | 0.1256           | 0.0016           | 0.3259           | 0.0407           | 0.1171           |
|        | <i>p</i> = 0.161  | <i>p</i> = 0.276 | <i>p</i> = 0.150 | <i>p</i> = 0.689 | <i>p</i> = 0.465 | <i>p</i> = 0.990 | <i>p</i> = 0.079 | <i>p</i> = 0.766 | <i>p</i> = 0.365 |
| FT-H*  | -0.0256           | <b>0.3725</b>    | -0.0382          | 0.0714           | 0.0415           | 0.0039           | 0.2732           | 0.0700           | 0.0573           |
|        | <i>p</i> = 0.816  | <b>p = 0.004</b> | <i>p</i> = 0.792 | <i>p</i> = 0.612 | <i>p</i> = 0.810 | <i>p</i> = 0.977 | <i>p</i> = 0.144 | <i>p</i> = 0.608 | <i>p</i> = 0.658 |
| FT-L*  | -0.0836           | <b>0.4329</b>    | -0.0519          | 0.0047           | 0.0837           | -0.1396          | 0.3101           | -0.1657          | 0.1382           |
|        | <i>p</i> = 0.447  | <b>p = 0.001</b> | <i>p</i> = 0.720 | <i>p</i> = 0.973 | <i>p</i> = 0.628 | <i>p</i> = 0.292 | <i>p</i> = 0.095 | <i>p</i> = 0.222 | <i>p</i> = 0.284 |
| FT-MT* | -0.1012           | -0.0974          | <b>0.3424</b>    | -0.0015          | 0.2698           | 0.1714           | 0.0382           | <b>0.2743</b>    | -0.0024          |
|        | <i>p</i> = 0.357  | <i>p</i> = 0.463 | <b>p = 0.015</b> | <i>p</i> = 0.992 | <i>p</i> = 0.111 | <i>p</i> = 0.194 | <i>p</i> = 0.841 | <b>p = 0.041</b> | <i>p</i> = 0.985 |
| FPN    | 0.0598            | 0.2274           | 0.1950           | -0.0423          | 0.1323           | 0.0662           | 0.1130           | 0.1815           | 0.0673           |
|        | <i>p</i> = 0.587  | <i>p</i> = 0.083 | <i>p</i> = 0.175 | <i>p</i> = 0.764 | <i>p</i> = 0.442 | <i>p</i> = 0.618 | <i>p</i> = 0.552 | <i>p</i> = 0.181 | <i>p</i> = 0.603 |

Aberrations: DMT-1 (divalent metal transporter -1), L-CH (L-type calcium channel Subunit CACNa1D), TfR-1 or -2 (transferrin receptor -1 or -2), FT-H (ferritin heavy chain), FT-L (ferritin light chain), FT-MT (ferritin- mitochondrial), FPN (ferroportin), Hepc (hepcidin), Hb (hemoglobin), sTfR (soluble transferrin receptor), TSAT (transferrin saturation), CRP (C-reactive protein), LVEF(left ventricle ejection fraction), TCG (transpulmonary pressure gradient), CO (cardiac output), NT-proBNP (N-terminal pro-brain natriuretic peptide).
